# Supplementary material for: Phlebotomine Sand Fly Fauna andLeishmaniaInfection in the Vicinity of the Serra do Cipó National Park, a Natural Brazilian Heritage Site
Source: Hindawi journal article supplement (doi:10.1155/2015/385493), 2015-01-01
Supplement: f1 [file 385493.f1.pdf]

1 Supplementary Table. Multiple nucleotide alignment of *Leishmania* DNA carried by  
 2 *Lutzomyia* captured in Jaboticatubas, state of Minas Gerais, Brazil. The discriminating  
 3 mutations for the *Leishmania* species (at positions 38, 59 and 62) are marked with black  
 4 arrows. Reference strains: *Le. chagasi* M81430.1 and *Le. braziliensis* M80292.1. Test  
 5 samples are identified by numbers followed by the *Lutzomyia* species carrying the  
 7 *Leishmania* DNA. Study period: May 2012–April 2013.

9

|                                  | 10                                                                           | 20 | 30 |
|----------------------------------|------------------------------------------------------------------------------|----|----|
| <i>Le. chagasi</i> M81430.1      | T C C C A T C G C A A C C T C G G T T C G G T G T G T G G C G C C T T T      |    |    |
| 52 <i>Lu. pessoai</i>            | T C C C A T C G C A A C C T C G G T T C G G T G T G T G G C G C C T T T      |    |    |
| 107 <i>Lu. cortelezzii</i>       | T C C C A T C G C A A C C T C G G T T C G G T G T G T G G C G C C T T T      |    |    |
| 109 <i>Lu. migonei</i>           | T C C C A T C G C A A C C T C G G T T C G G T G T G T G G C G C C T T T      |    |    |
| 111 <i>Lu. whitmani</i>          | T C C C A T C G C A A C C T C G G T T C G G T G T G T G G C G C C T T T      |    |    |
| 114 <i>Lu. longipalpis</i>       | T C C C A T C G C A A C C T C G G T T C G G T G T G T G G C G C C T T T      |    |    |
| 117 <i>Lu. cortelezzii</i>       | T C C C A T C G C A A C C T C G G T T C G G T G T G T G G C G C C T T T      |    |    |
| 125 <i>Lu. lenti</i>             | T C C C A T C G C A A C C T C G G T T C G G T G T G T G G C G C C T T T      |    |    |
| <i>Le. braziliensis</i> M80292.1 | T C C C A T C G C A A C <b>T</b> C G G T T C G G T G T G T G G C G C C T T T |    |    |
| 216 <i>Lu. cortelezzii</i>       | T C C C A T C G C A A C C T C G G T T C G G T G T G T G G C G C C T T T      |    |    |
| 104 <i>Lu. cortelezzii</i>       | T C C C A T C G C A A C C T C G G T T C G G T G T G T G G C G C C T T T      |    |    |
| 106 <i>Lu. cortelezzii</i>       | T C C C A T C G C A A C C T C G G T T C G G T G T G T G G C G C C T T T      |    |    |
| 108 <i>Lu. pessoai</i>           | T C C C A T C G C A A C C T C G G T T C G G T G T G T G G C G C C T T T      |    |    |
| 110 <i>Lu. cortelezzii</i>       | T C C C A T C G C A A C C T C G G T T C G G T G T G T G G C G C C T T T      |    |    |
| 112 <i>Lu. lenti</i>             | T C C C A T C G C A A C C T C G G T T C G G T G T G T G G C G C C T T T      |    |    |
| 113 <i>Lu. intermedia</i>        | T C C C A T C G C A A C C T C G G T T C G G T G T G T G G C G C C T T T      |    |    |
| 115 <i>Lu. cortelezzii</i>       | T C C C A T C G C A A C C T C G G T T C G G T G T G T G G C G C C T T T      |    |    |
| 126 <i>Lu. lenti</i>             | T C C C A T C G C A A C C T C G G T T C G G T G T G T G G C G C C T T T      |    |    |
| 211 <i>Lu. whitmani</i>          | T C C C A T C G C A A C C T C G G T T C G G T G T G T G G C G C C T T T      |    |    |
| 214 <i>Lu. cortelezzii</i>       | T C C C A T C G C A A C C T C G G T T C G G T G T G T G G C G C C T T T      |    |    |
| 217 <i>Lu. cortelezzii</i>       | T C C C A T C G C A A C C T C G G T T C G G T G T G T G G C G C C T T T      |    |    |
| 218 <i>Lu. longipalpis</i>       | T C C C A T C G C A A C C T C G G T T C G G T G T G T G G C G C C T T T      |    |    |
| 220 <i>Lu. pessoai</i>           | T C C C A T C G C A A C C T C G G T T C G G T G T G T G G C G C C T T T      |    |    |
| 221 <i>Lu. sordelli</i>          | T C C C A T C G C A A C C T C G G T T C G G T G T G T G G C G C C T T T      |    |    |
| 223 <i>Lu. longipalpis</i>       | T C C C A T C G C A A C C T C G G T T C G G T G T G T G G C G C C T T T      |    |    |
| 224 <i>Lu. pessoai</i>           | T C C C A T C G C A A C C T C G G T T C G G T G T G T G G C G C C T T T      |    |    |
| 226 <i>Lu. cortelezzii</i>       | T C C C A T C G C A A C C T C G G T T C G G T G T G T G G C G C C T T T      |    |    |
| 227 <i>Lu. cortelezzii</i>       | T C C C A T C G C A A C C T C G G T T C G G T G T G T G G C G C C T T T      |    |    |
| 229 <i>Lu. cortelezzii</i>       | T C C C A T C G C A A C C T C G G T T C G G T G T G T G G C G C C T T T      |    |    |
| 230 <i>Lu. longipalpis</i>       | T C C C A T C G C A A C C T C G G T T C G G T G T G T G G C G C C T T T      |    |    |

|                                  | 40                                                                      | 50 | 60 | 70 |
|----------------------------------|-------------------------------------------------------------------------|----|----|----|
| <i>Le. chagasi</i> M81430.1      | G - A G G G G T T T A G T G C G T C C G G T a C G a G C T C C G G T T C |    |    |    |
| 52 <i>Lu. pessoai</i>            | G - A G G G G T T T A G T G C G T C C G G T a C G a G C T C C G G T T C |    |    |    |
| 107 <i>Lu. cortelezzii</i>       | G - A G G G G T T T A G T G C G T C C G G T a C G a G C T C C G G T T C |    |    |    |
| 109 <i>Lu. migonei</i>           | G - A G G G G T T T A G T G C G T C C G G T a C G a G C T C C G G T T C |    |    |    |
| 111 <i>Lu. whitmani</i>          | G - A G G G G T T T A G T G C G T C C G G T a C G a G C T C C G G T T C |    |    |    |
| 114 <i>Lu. longipalpis</i>       | G - A G G G G T T T A G T G C G T C C G G T a C G a G C T C C G G T T C |    |    |    |
| 117 <i>Lu. cortelezzii</i>       | G - A G G G G T T T A G T G C G T C C G G T a C G a G C T C C G G T T C |    |    |    |
| 125 <i>Lu. lenti</i>             | G - A G G G G T T T A G T G C G T C C G G T a C G a G C T C C G G T T C |    |    |    |
| <i>Le. braziliensis</i> M80292.1 | G G A G G G G T T T A G T G C G T C C G G T G C G G G C T C C G G T T C |    |    |    |
| 216 <i>Lu. cortelezzii</i>       | G G A G G G G T T T A G T G C G T C C G G T G C G G G C T C C G G T T C |    |    |    |
| 104 <i>Lu. cortelezzii</i>       | G G A G G G G T T T A G T G C G T C C G G T G C G G G C T C C G G T T C |    |    |    |
| 106 <i>Lu. cortelezzii</i>       | G G A G G G G T T T A G T G C G T C C G G T G C G G G C T C C G G T T C |    |    |    |
| 108 <i>Lu. pessoai</i>           | G G A G G G G T T T A G T G C G T C C G G T G C G G G C T C C G G T T C |    |    |    |
| 110 <i>Lu. cortelezzii</i>       | G G A G G G G T T T A G T G C G T C C G G T G C G G G C T C C G G T T C |    |    |    |
| 112 <i>Lu. lenti</i>             | G G A G G G G T T T A G T G C G T C C G G T G C G G G C T C C G G T T C |    |    |    |
| 113 <i>Lu. intermedia</i>        | G G A G G G G T T T A G T G C G T C C G G T G C G G G C T C C G G T T C |    |    |    |
| 115 <i>Lu. cortelezzii</i>       | G G A G G G G T T T A G T G C G T C C G G T G C G G G C T C C G G T T C |    |    |    |
| 126 <i>Lu. lenti</i>             | G G A G G G G T T T A G T G C G T C C G G T G C G G G C T C C G G T T C |    |    |    |
| 211 <i>Lu. whitmani</i>          | G G A G G G G T T T A G T G C G T C C G G T G C G G G C T C C G G T T C |    |    |    |
| 214 <i>Lu. cortelezzii</i>       | G G A G G G G T T T A G T G C G T C C G G T G C G G G C T C C G G T T C |    |    |    |
| 217 <i>Lu. cortelezzii</i>       | G G A G G G G T T T A G T G C G T C C G G T G C G G G C T C C G G T T C |    |    |    |
| 218 <i>Lu. longipalpis</i>       | G G A G G G G T T T A G T G C G T C C G G T G C G G G C T C C G G T T C |    |    |    |
| 220 <i>Lu. pessoai</i>           | G G A G G G G T T T A G T G C G T C C G G T G C G G G C T C C G G T T C |    |    |    |
| 221 <i>Lu. sordelli</i>          | G G A G G G G T T T A G T G C G T C C G G T G C G G G C T C C G G T T C |    |    |    |
| 223 <i>Lu. longipalpis</i>       | G G A G G G G T T T A G T G C G T C C G G T G C G G G C T C C G G T T C |    |    |    |
| 224 <i>Lu. pessoai</i>           | G G A G G G G T T T A G T G C G T C C G G T G C G G G C T C C G G T T C |    |    |    |
| 226 <i>Lu. cortelezzii</i>       | G G A G G G G T T T A G T G C G T C C G G T G C G G G C T C C G G T T C |    |    |    |
| 227 <i>Lu. cortelezzii</i>       | G G A G G G G T T T A G T G C G T C C G G T G C G G G C T C C G G T T C |    |    |    |
| 229 <i>Lu. cortelezzii</i>       | G G A G G G G T T T A G T G C G T C C G G T G C G G G C T C C G G T T C |    |    |    |
| 230 <i>Lu. longipalpis</i>       | G G A G G G G T T T A G T G C G T C C G G T G C G G G C T C C G G T T C |    |    |    |
